# Supplementary material
Source: PubMed Central journal article supplement (PMC4498466)
Supplement: ADSC-357-1909-s001.pdf [file ADSC-357-1909-s001.pdf]

*Advanced*   
**Synthesis &  
Catalysis**

Supporting Information

© Copyright Wiley-VCH Verlag GmbH & Co. KGaA, 69451 Weinheim, 2014

# Regioselective Enzymatic $\beta$ -Carboxylation of *p*-Hydroxystyrene Derivatives Catalyzed by Phenolic Acid Decarboxylases

Christiane Wuensch,<sup>[a,b,†]</sup> Tea Pavkov-Keller,<sup>[a,c,†]</sup> Georg Steinkellner,<sup>[a,c]</sup> Johannes Gross,<sup>[a,b]</sup> Michael Fuchs,<sup>[a]</sup> Altijana Hromic,<sup>[a,c]</sup> Andrzej Lyskowski,<sup>[a,c]</sup> Kerstin Fauland,<sup>[a,c]</sup> Karl Gruber,<sup>[c]</sup> Silvia M. Glueck<sup>[a,b]\*</sup> and Kurt Faber<sup>[b]\*</sup>

† These authors contributed equally to this work.

<sup>[a]</sup> Austrian Centre of Industrial Biotechnology, c/o

<sup>[b]</sup> Department of Chemistry, Organic & Bioorganic Chemistry, Heinrichstrasse 28,  
University of Graz, 8010 Graz, Austria  
Fax: (+43)-316-380-9840; phone: (+43)-316-380-5332; Email: Si.Glueck@Uni-Graz.at,  
Kurt.Faber@Uni-Graz.at

<sup>[c]</sup> Institute of Molecular Biosciences, Humboldtstrasse 50, University of Graz, 8010 Graz,  
Austria

## Supporting Information

### Protein mutagenesis:

Enzyme sequence of ferulic acid decarboxylase from *Enterobacter* sp. Px6-4 (FDC\_Es) S2  
SDS Pages to verify protein overexpression of enzyme variants S3

### Crystal structure determination:

Typical crystals of FDC\_Es S4  
Data collection and refinement statistics S4  
Overall dimeric structure of FDC\_Es S5  
Electron density map S5  
Sequence alignment S7

HMBC-NMR spectra S8

References S14

## Protein mutagenesis

The amino acid residues which were mutated are highlighted in green. The following mutants have been prepared: FDC\_Es **Y19F**, FDC\_Es **Y21F**, FDC\_Es **Y39F**, FDC\_Es **E72A**.

Enzyme sequence of ferulic acid decarboxylase from *Enterobacter* sp. Px6-4 (FDC\_Es):  
MNTFDKHDLSGFVKGHLVYTYDNGWEYEIYVKNENTLDYRIHSGLVGNRWVKDQQ  
AYIVRVGESIYKISWTEPTGTDVSLIVNLGDSLFGHTIFFPRWVMNNPEKTVCFQNDHI  
PLMNSYRDAGPAYPTEVIDEFATITFVRDCGANNESVIACAASELPKNFPDNLK

CDS:

ATGAACACCTTCGATAAACATGATCTGAGCGGTTTTGTTGGTAAACATCTGGGT**G**  
**A**TACCT**TAT**GATAATGGCTGGGAGTATGAGATCTATGTGAAAAATGAAAACACCCT  
GGAT**TAT**CGCATTTCATAGCGGTCTGGTTGGTAATCGTTGGGTAAAGATCAGCAG  
GCATATATTGTTTCGTGTGGGTGAAAGCATCTATAAAATCAGCTGGACC**GAA**CCGA  
CCGGCACCGATGTTAGCCTGATTGTTAATCTGGGTGATAGCCTGTTTCATGGCACC  
ATCTTTTTTCCGCGTTGGGTGATGAATAATCCGGAAAAAACCGTTTGCTTTCAGAA  
CGATCATATTCCGCTGATGAATAGCTATCGTGATGCAGGTCCGGCATATCCGACC  
GAAGTTATTGATGAATTTGCCACCATTACCTTTGTTTCGTGATTGTGGTGCAAATAA  
CGAAAGCGTTATTGCATGTGCAGCAAGCGAACTGCCGAAAAACTTTCGGGATAAT  
CTGAAATAA

Tyrosine (Y): **TAT/TAC**

Phenylalanine (F): **TTT/TTC**

Glutamic acid (E): **GAG/GAA**

Alanine (A): **GCG/GCT/GCC/GC**

### SDS Pages to verify overexpression of enzyme variants

Successful overexpression<sup>[1,2]</sup> of soluble enzyme was obtained for all mutants of ferulic acid decarboxylase from *Enterobacter* sp. (FDC\_Es). The mutated amino acid residues are the following (see also above): Y19F, Y21F, Y39F, E72A. Enzyme preparations with and without induction using IPTG are shown.

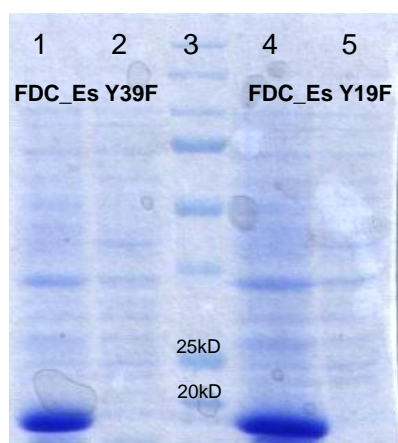

**Figure S1:** SDS-PAGE analysis of enzyme variants FDC\_Es Y19F and FDC\_Es Y39F.

Lane 1: FDC\_Es Y39F mutant with IPTG induction; lane 2: FDC\_Es Y39F mutant without induction; lane 3: Precision Plus Protein Standard All Blue Standard (5 μL, BIORAD); lane 4: FDC\_Es Y19F mutant with IPTG induction; lane 5: FDC\_Es Y19F mutant without induction.

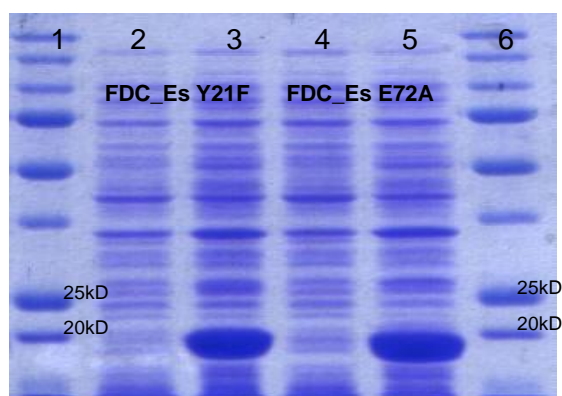

**Figure S2:** SDS-PAGE analysis of enzyme variants FDC\_Es Y21F and FDC\_Es E72A.

Lane 1/6: Precision Plus Protein Standard All Blue Standard (5 μL, BIORAD); lane 2: FDC\_Es Y21F mutant without IPTG induction; lane 3: FDC\_Es Y21F mutant with IPTG induction; lane 4: FDC\_Es E72A mutant without IPTG induction; lane 5: FDC\_Es E72A mutant with IPTG induction.

## Crystal structure determination

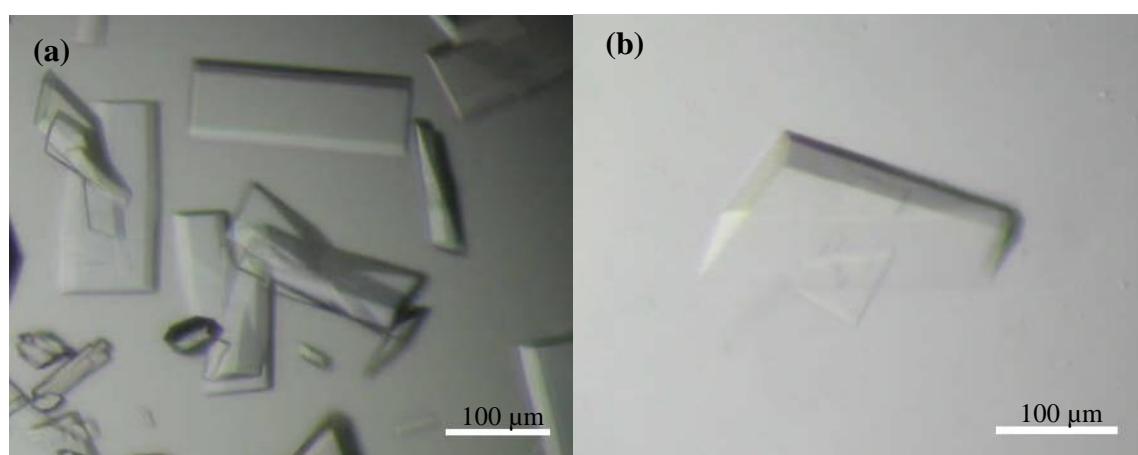

**Figure S3.** Typical crystals of ferulic acid decarboxylases from *Enterobacter* sp. (FDC\_Es); (a) FDC\_Es WT (wild type) and (b) FDC\_Es E72A variant.

**Table S1.** Data collection and refinement statistics.

|                                      | FDC_Es native                     | FDC_Es E72A                       |
|--------------------------------------|-----------------------------------|-----------------------------------|
| <b>Data collection</b>               |                                   |                                   |
| Space group                          | P 2 2 <sub>1</sub> 2 <sub>1</sub> | P 2 2 <sub>1</sub> 2 <sub>1</sub> |
| a, b, c (Å)                          | 39.4, 83.8, 133.3                 | 39.21, 83.9, 132.0                |
| α, β, γ (°)                          | 90, 90, 90                        | 90, 90, 90                        |
| Resolution (Å)                       | 50-1.13 (1.20-1.13)               | 41.9 – 1.49 (1.59 -1.49)          |
| R <sub>merge</sub> (%)               | 7.4 (70.3)                        | 10.4 (71.4)                       |
| I/σ                                  | 14.2 (2.2)                        | 11.8 (2.4)                        |
| Completeness (%)                     | 99.7 (98.4)                       | 98.7 (93.2)                       |
| Multiplicity                         | 9.1 (7.2)                         | 8.4 (7.8)                         |
| <b>Refinement</b>                    |                                   |                                   |
| Resolution (Å)                       | 50-1.15                           | 41.9-1.49                         |
| No. reflections                      | 157334                            | 71216                             |
| R <sub>work</sub> /R <sub>free</sub> | 0.12/0.13                         | 0.16/0.18                         |
| <b>No. atoms</b>                     |                                   |                                   |
| Protein                              | 5943                              | 3302                              |
| Water                                | 533                               | 478                               |
| Mean B factor                        | 13.54                             | 20.99                             |
| <b>Rmsd</b>                          |                                   |                                   |
| Bond lengths (Å)                     | 0.007                             | 0.006                             |
| Bond angles (°)                      | 0.998                             | 1.030                             |
| <b>Ramachandran plot</b>             |                                   |                                   |
| Most favored residues (%)            | 97.1                              | 96.8                              |
| Outliers (%)                         | 0                                 | 0                                 |
| <b>PDB</b>                           | 4UU3                              | 4UU2                              |

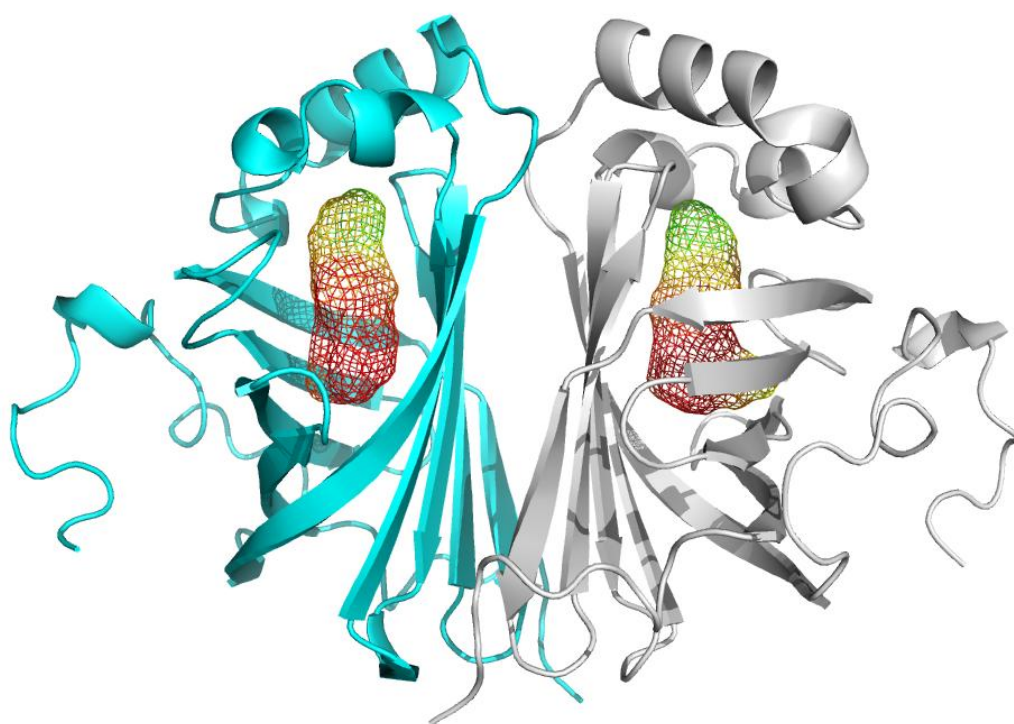

**Figure S4.** Overall dimeric structure of FDC\_Es. The structure shows a lipocalin-like fold, which is common for this enzyme family. The cavity in the active site, as calculated by Casox,<sup>[3]</sup> is shown in mesh presentation and colored according to hydrophobicity (red – more hydrophobic, green – more hydrophilic). Individual monomers are shown in ribbon representation and are colored in cyan and grey. The figure was prepared using the program PyMOL (Schrodinger Inc.).

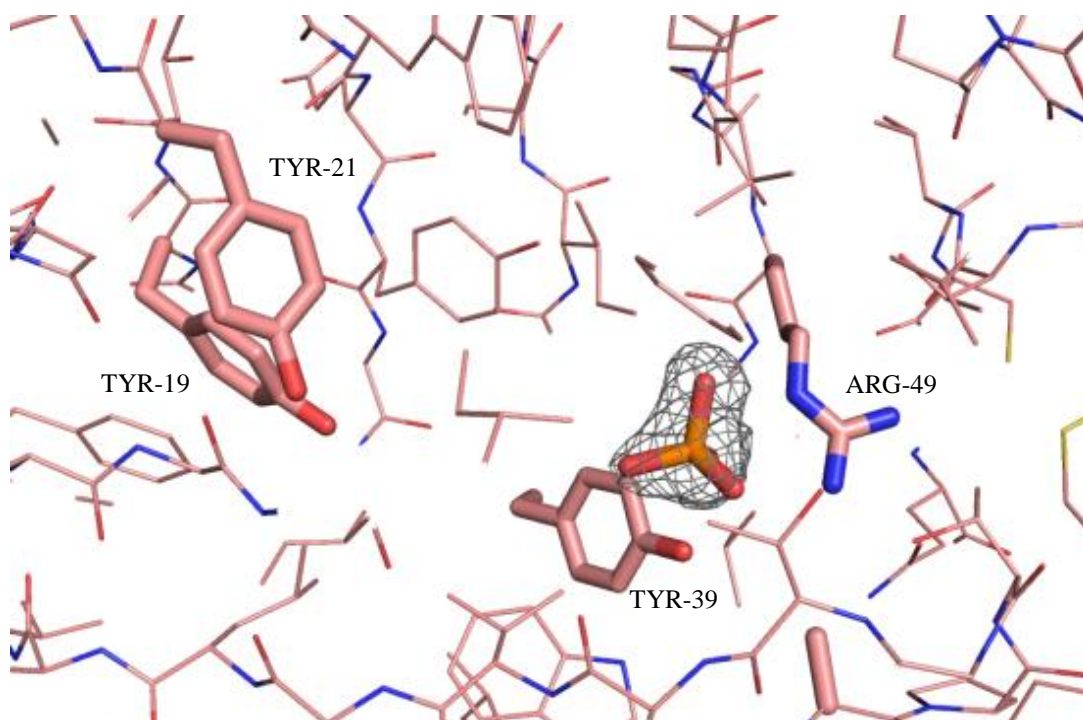

**Figure S5.** Electron density map. Fo-Fc omit density (grey, contoured at  $3\sigma$ ) in the active site of FDC\_Es E72A variant. The orientation of the active site corresponds to that shown in Figure 2. The bound  $[\text{PO}_4]^{3-}$  (or  $[\text{SO}_4]^{2-}$ ) is shown in orange. The catalytically important amino acid residues are shown in stick representation and are labeled. The figure was prepared using the program PyMOL (Schrodinger Inc.).

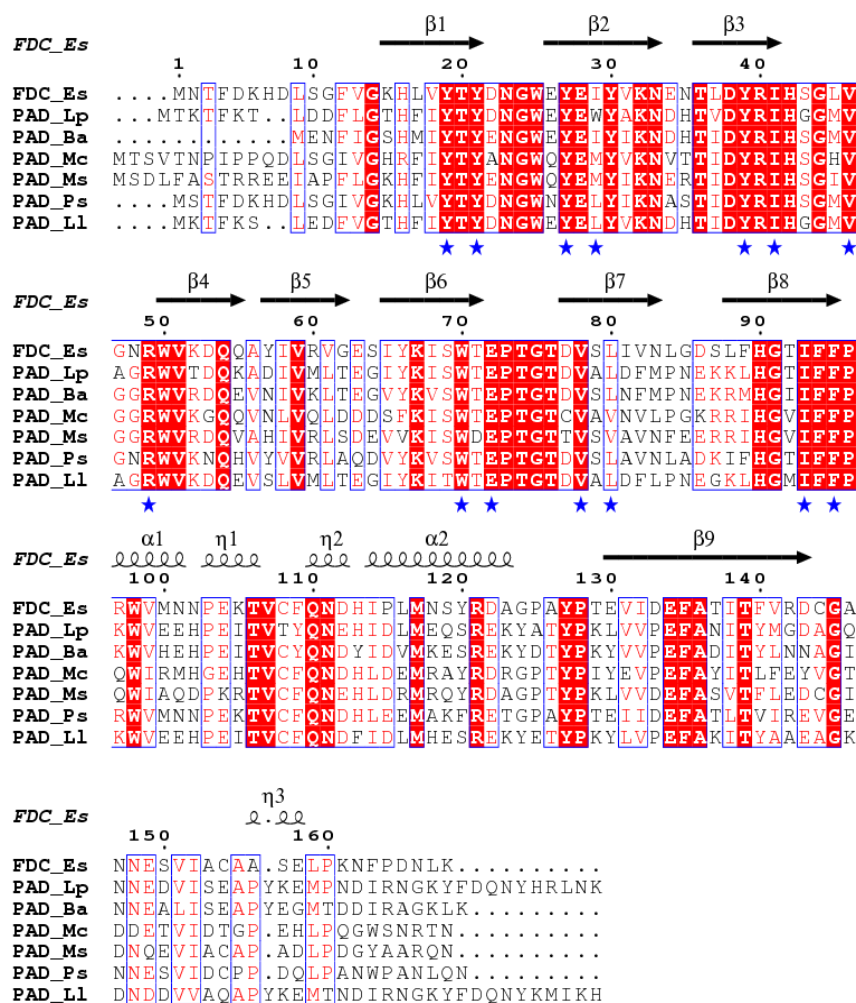

**Figure S6.** Sequence alignment of investigated PADs and FDC\_Es (see Table 2). Residues situated in the active site are indicated with a blue star. The only variations can be observed for the residues in position 29 and 80 (referring to FDC\_Es). Position 80 accommodates a hydrophobic residue: Leu or Val, respectively, whereas position 29 shows the most variation accommodating Ile, Trp, Met or Leu. The secondary structure elements are derived from the FDC\_Es structure.



### HMBC-NMR spectra

#### (*E*)-3-(4-Hydroxy-3-methylphenyl)acrylic acid (4b)

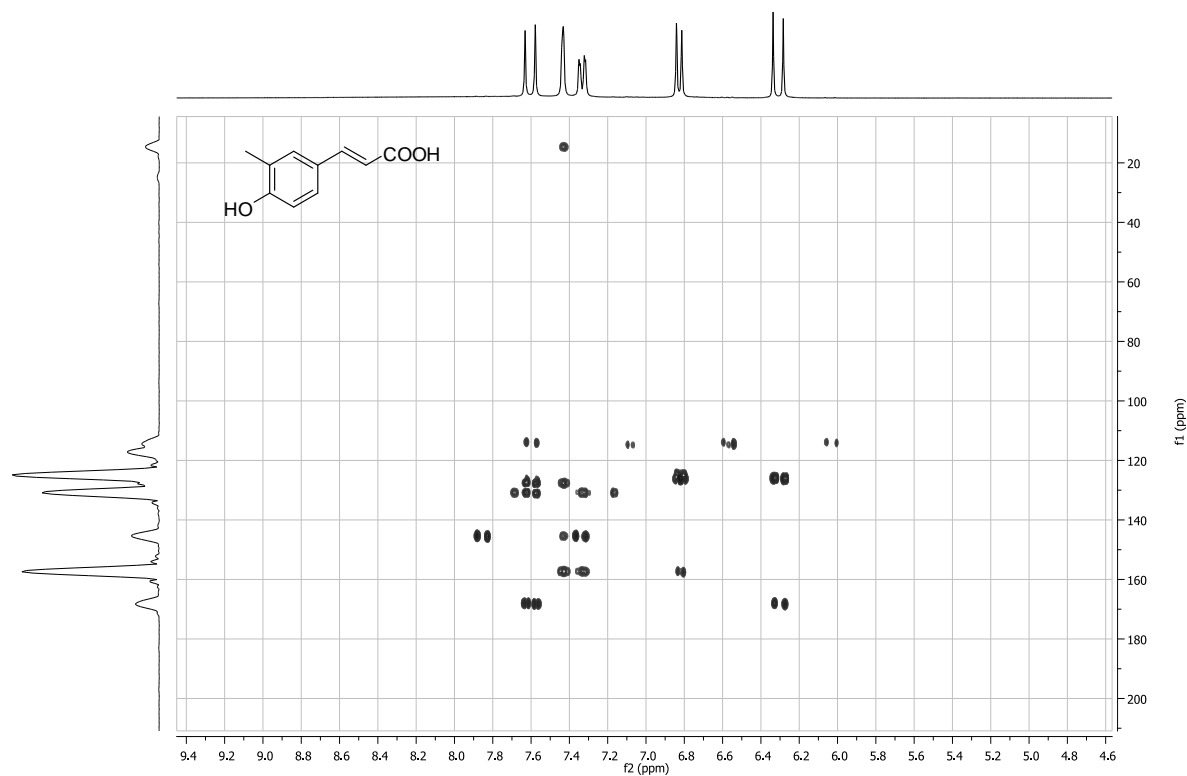

#### (*E*)-3-(3-Chloro-4-hydroxyphenyl)acrylic acid (5b)

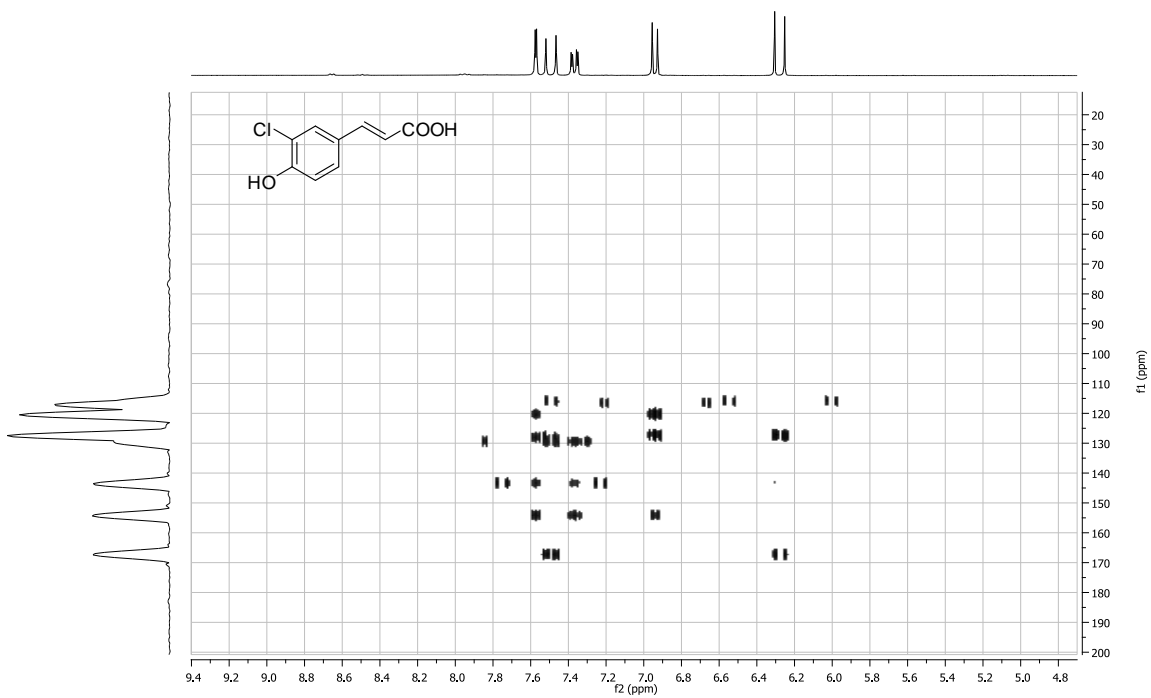

**(E)-3-(3-Bromo-4-hydroxyphenyl)acrylic acid(6b):**

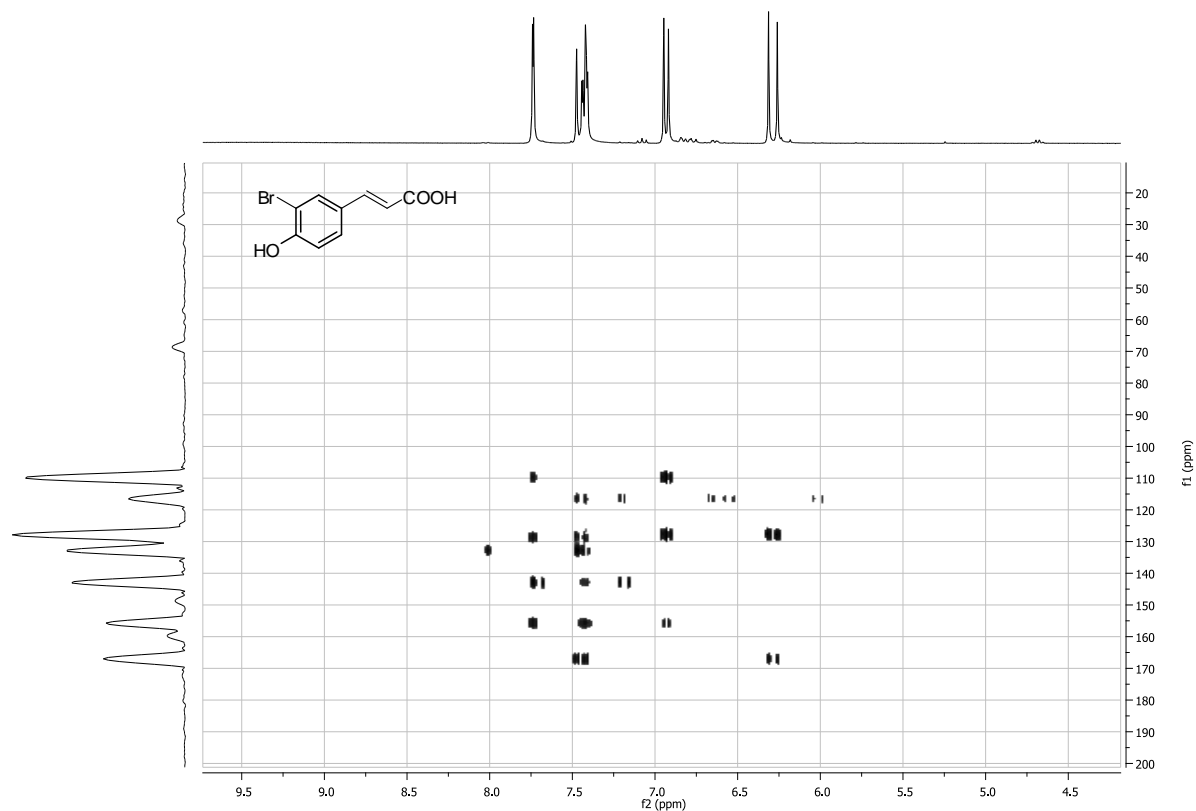

**(E)-3-(4-Hydroxy-3,5-dimethylphenyl)acrylic acid(7b)**

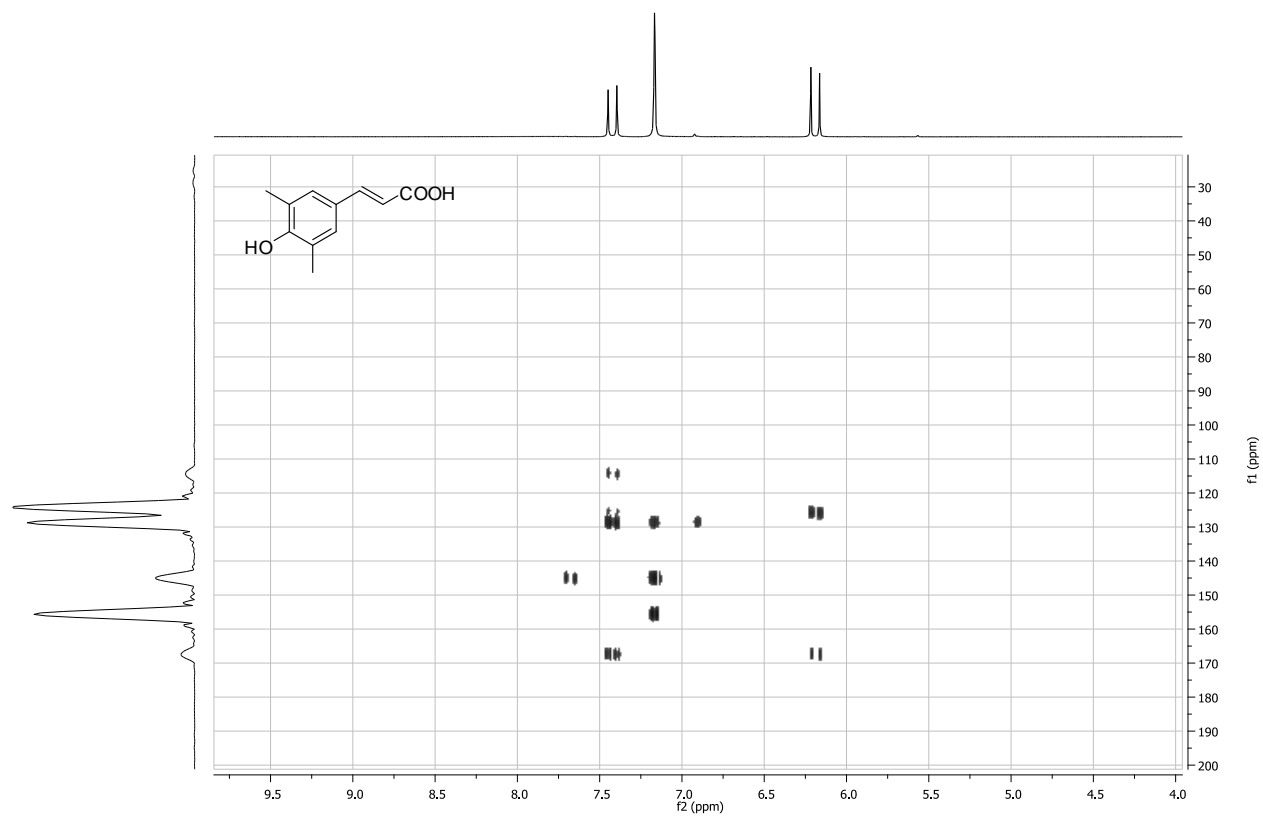

# $^1\text{H}$ and $^{13}\text{C}$ -NMR spectra

## 2,6-Dimethyl-4-vinylphenol (7a)

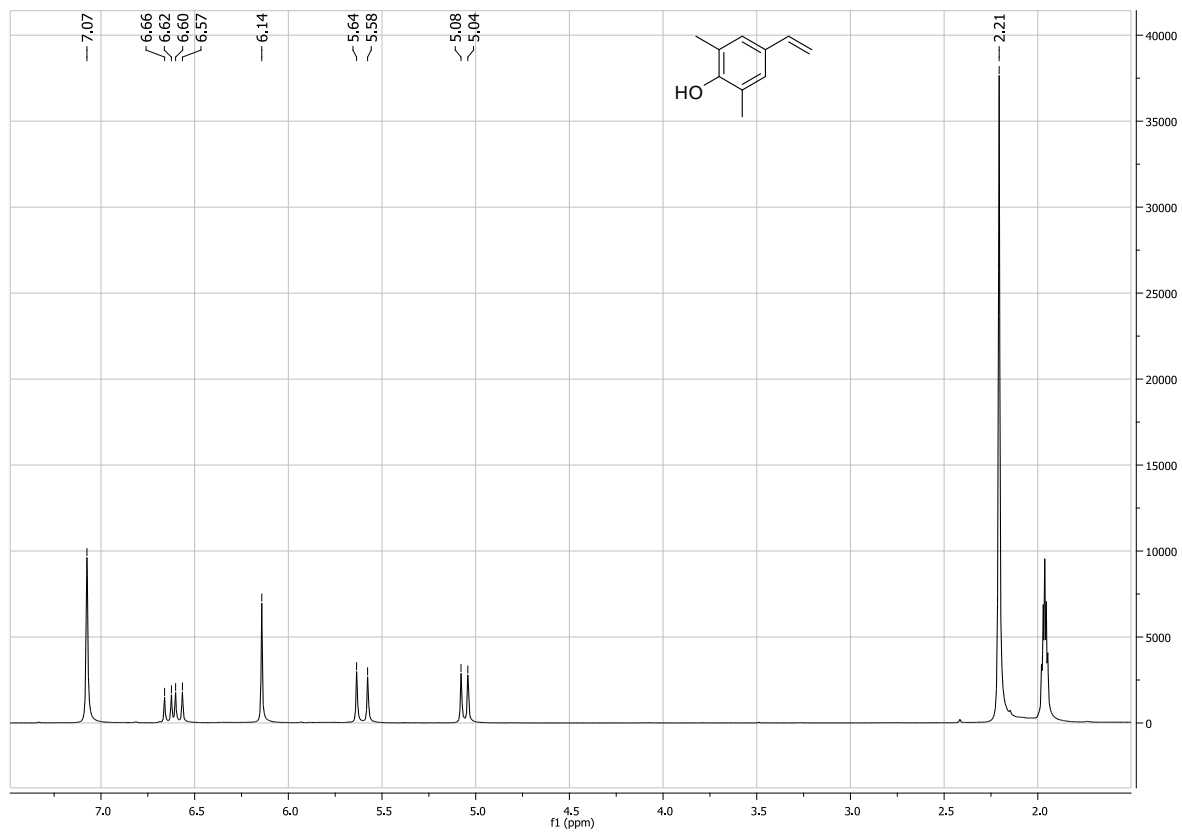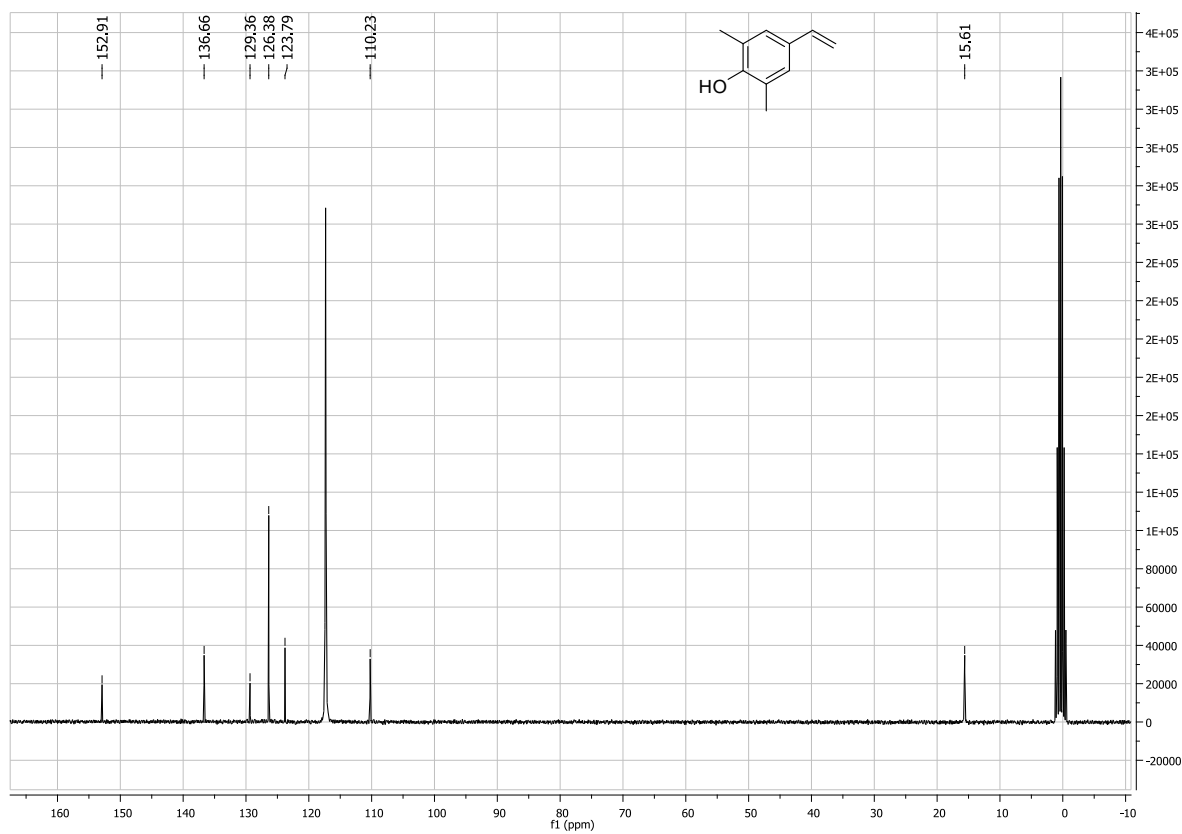

## 2-Bromo-4-vinylphenol (6a)

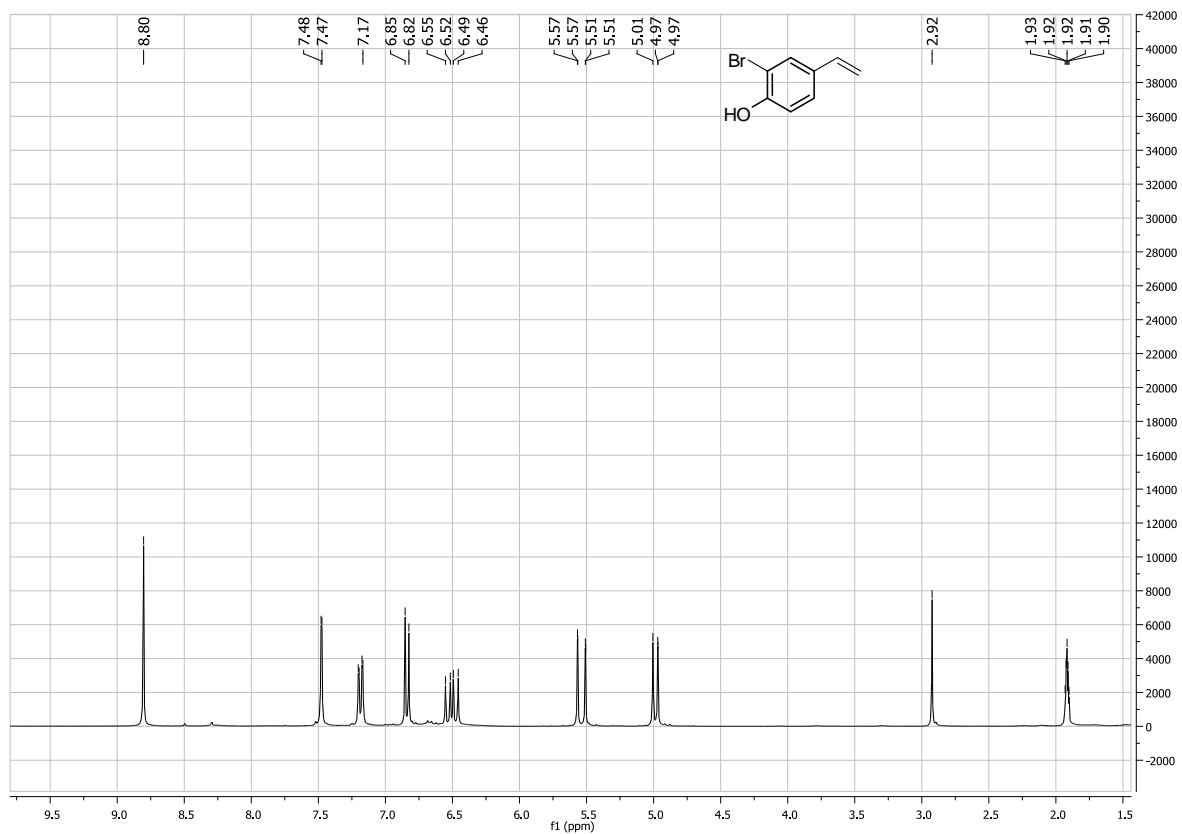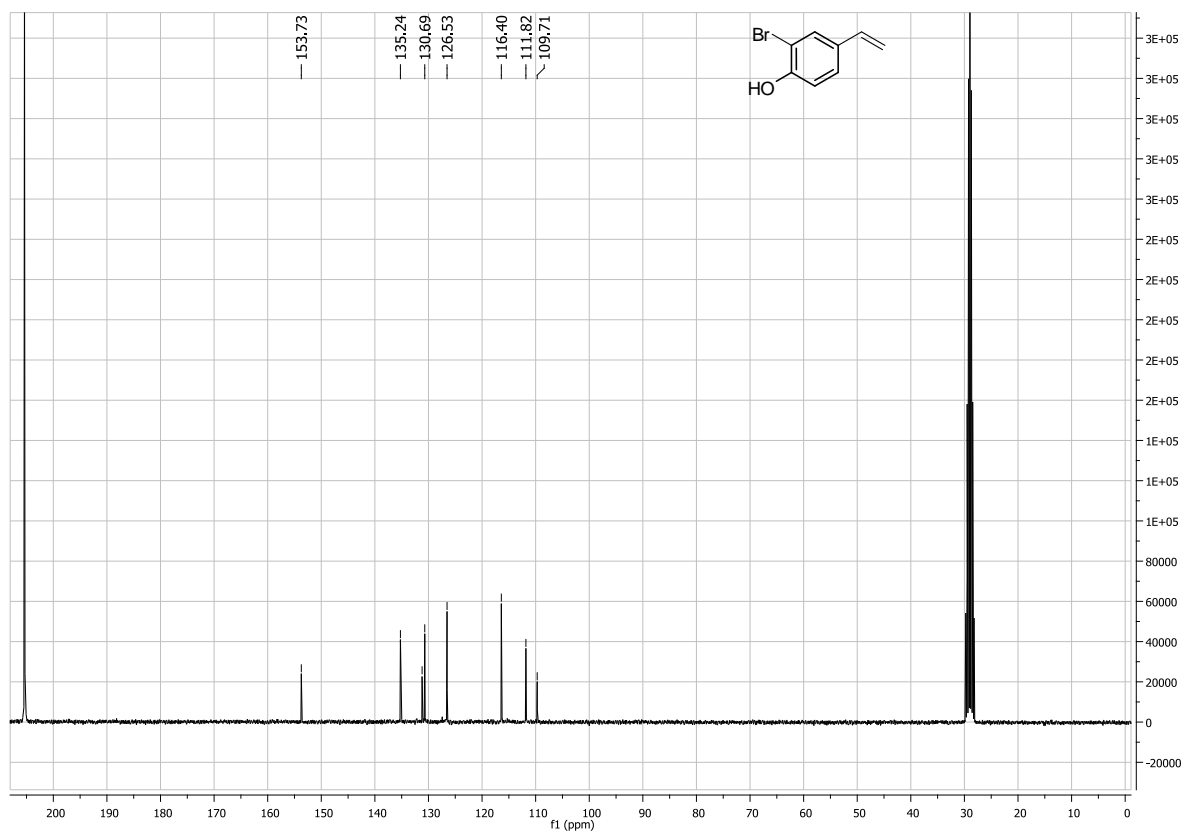

# 4-(Prop-1-en-2-yl)phenol(10a)

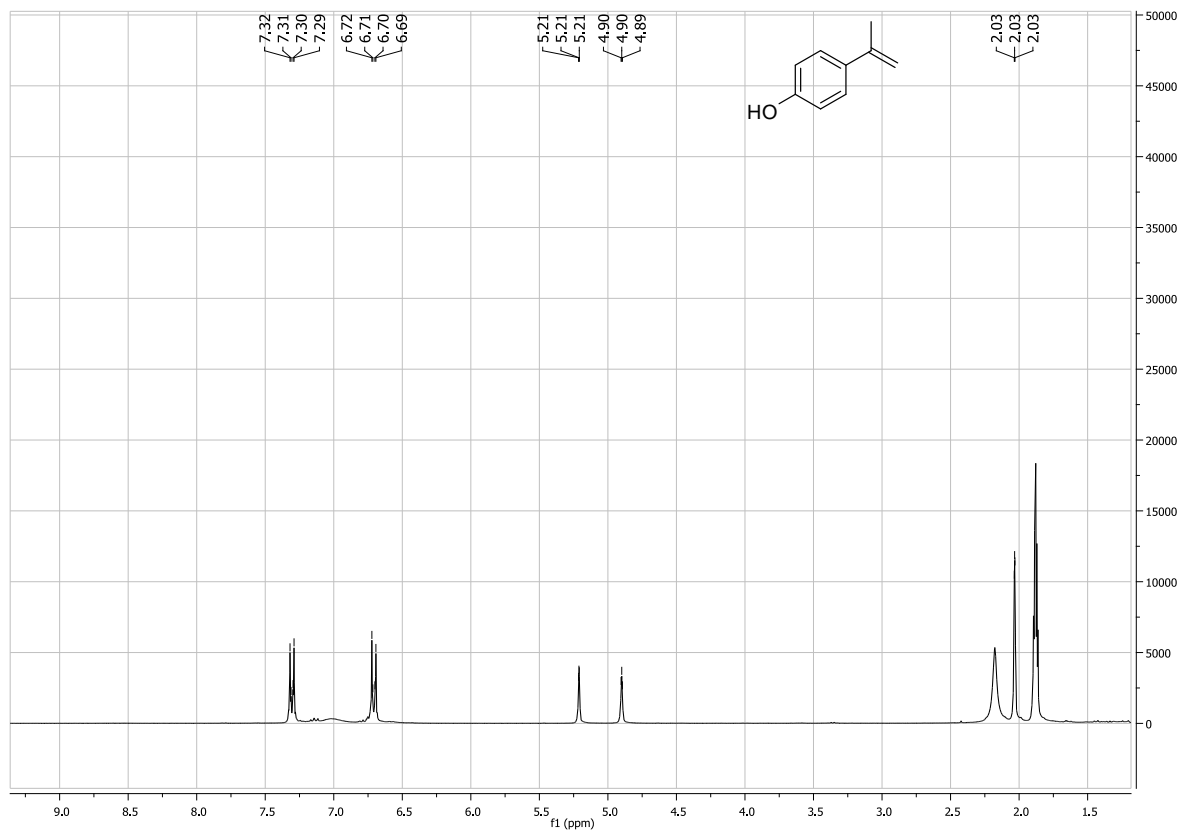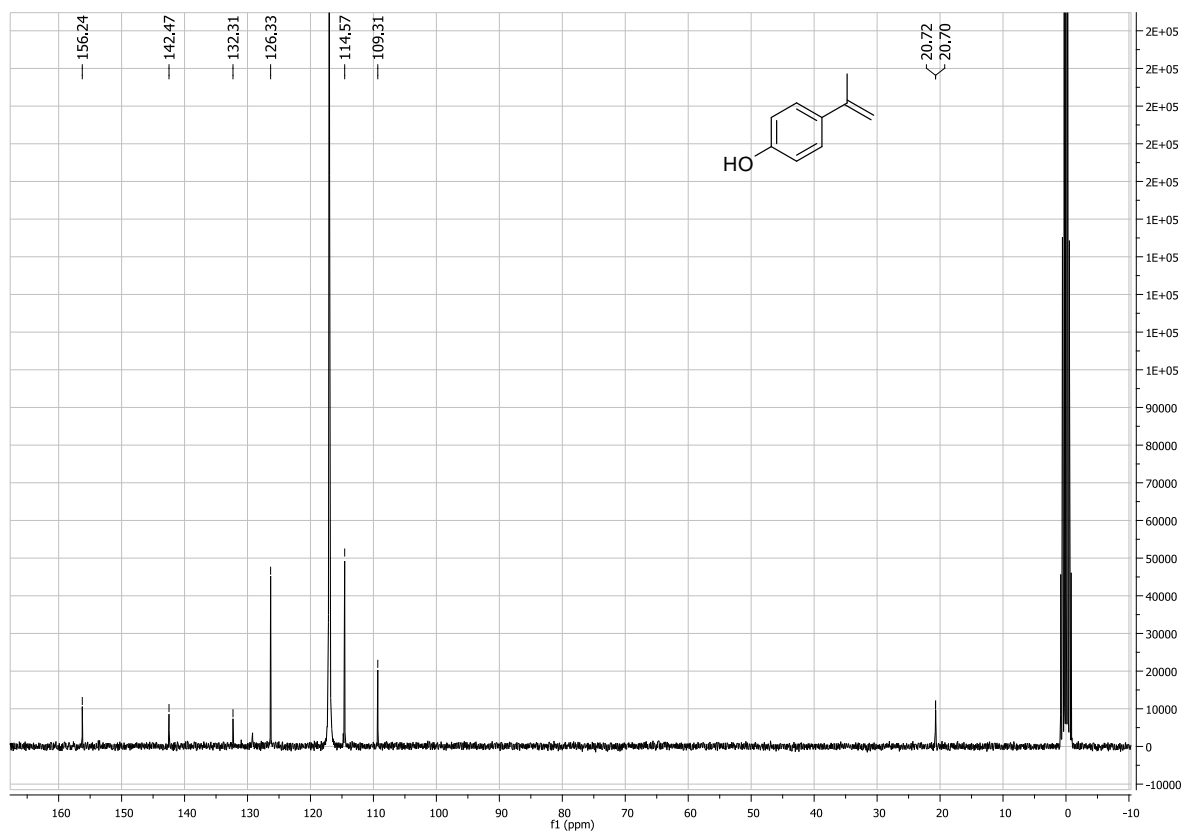

## 2-Methoxy-5-vinylphenol(11a)

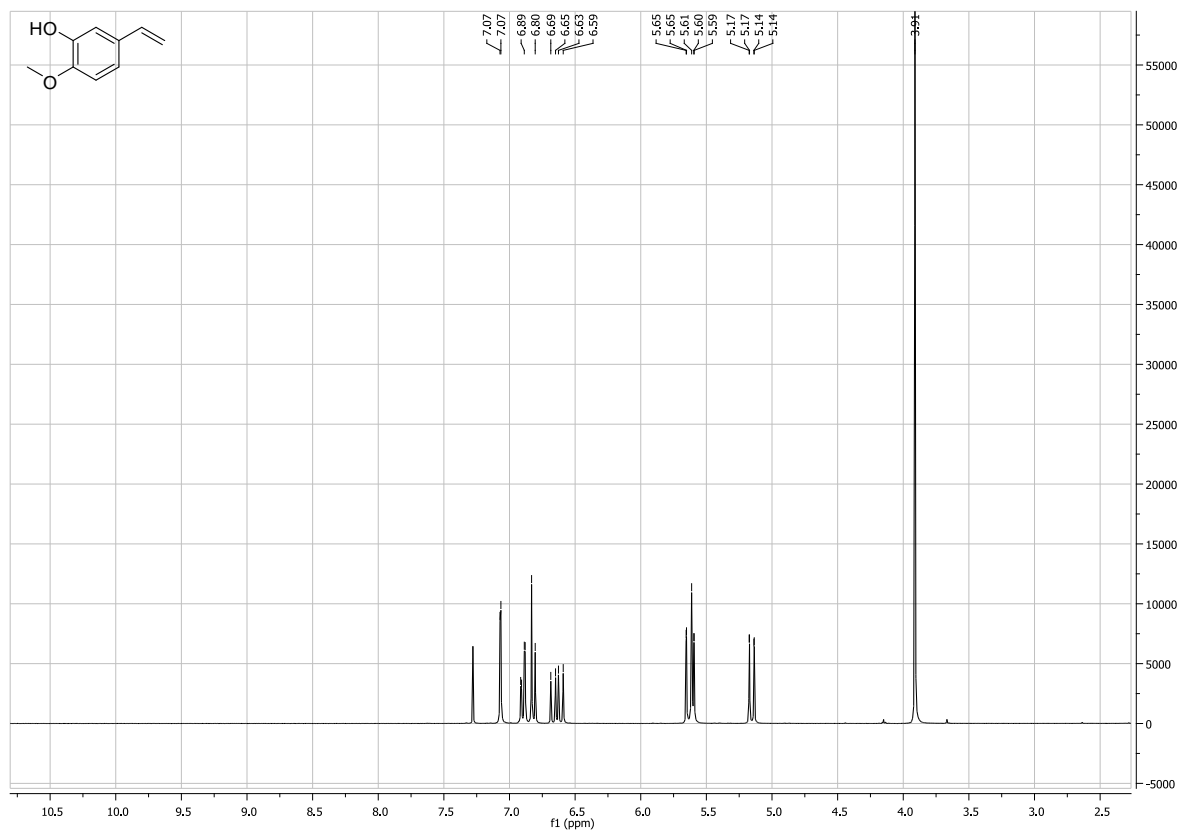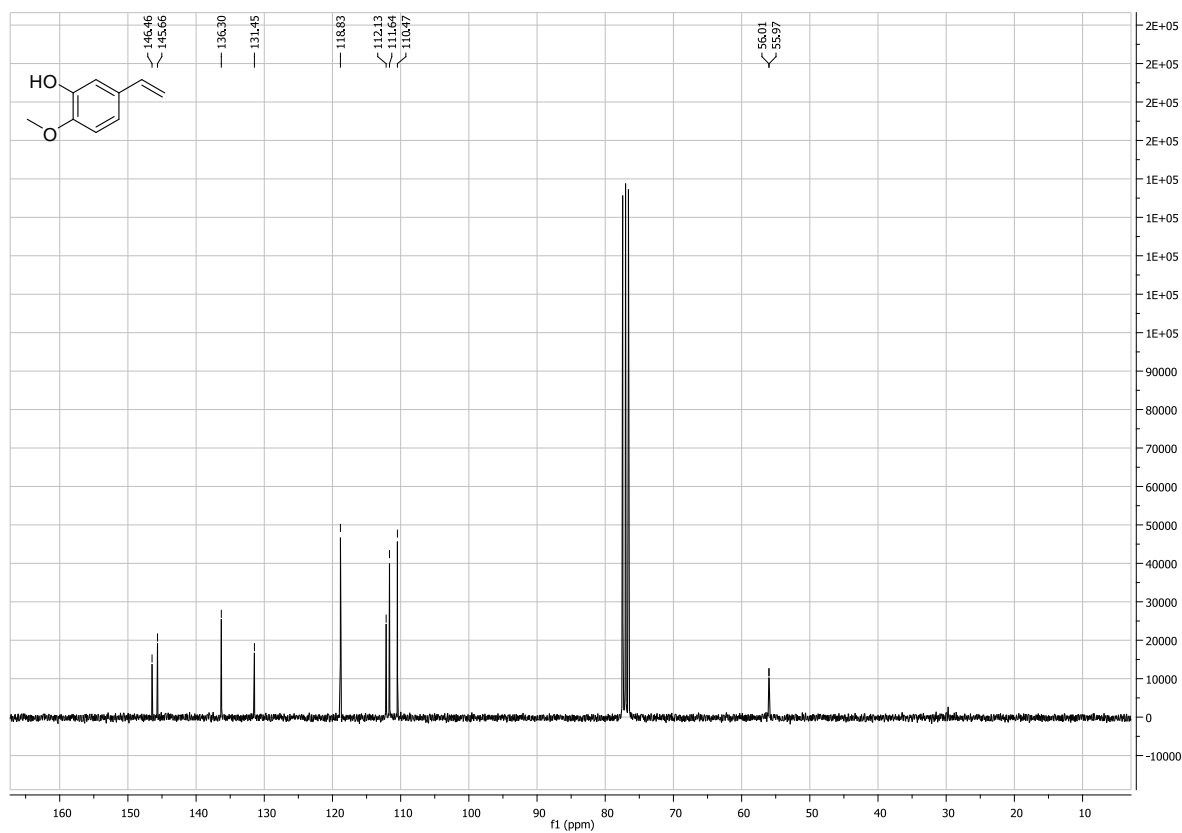

## References

- [1] C. Wuensch, S. M. Glueck, J. Gross, D. Koszelewski, M. Schober, K. Faber, *Org. Lett.* **2012**, *14*, 1974-1977.
- [2] C. Wuensch, J. Gross, G. Steinkellner, K. Gruber, S. M. Glueck, K. Faber, *Angew. Chem. Int. Ed.* **2013**, *52*, 2293-2297.
- [3] G. Steinkellner, R. Rader, G. G. Thallinger, C. Kratky, K. Gruber, *BMC Bioinform.* **2009**, *10*, 32.
